# Supplementary material for: The incidence of myopia and the factors associated with it among primary and junior high school students in Shihezi, China, a cohort study based on the SHAP model
Source: Research Square preprint supplement (doi:10.21203/rs.3.rs-7522290/v1), 2025-09-17
Supplement: Supplementary file 1 [file 35e07362f20b3132d0ffa1bd.docx]

|  | **Content of the survey** | | **options** |
| --- | --- | --- | --- |
| **A01** | **Grade** | **□□** | |
| **A011** | **ID** | **□□□□** | |
| **A02** | **Sex** | **1. male 2. female** | |
| **A03** | **Whether or not you live at the school** | **1. yes 2. no** | |

**B、On-campus eye care environment**

|  | **Content of the survey** | **options** |
| --- | --- | --- |
| **B01** | **Are class seats switched regularly?** | **1. never (or only individually rotated)**  **2. once a semester 3. once a month**  **4. bi-weekly 5. weekly** |
| **B02** | **Do desk and chair heights adjust to your height?** | **1. never or desks and chairs are not adjustable**  **2. once a school year**  **3. once a semester**  **4. once every two to three months** |
| **B03** | **How many times a day do you do eye exercises at school?** | **1. 1 time 2. 2 times**  **3. 3 times or more 4. Not in school** |
| **B04** | **Where do you typically move around during recess?** | **1. inside the school building 2. outdoors (e.g. playground, etc.)** |

**C、Out-of-school eye use**

|  | **Content of the survey** | **options** |
| --- | --- | --- |
| **C01** | **In the past week, how long, on average, did you do your homework/read and write after school each day?** | **1. Less than 1 hour**  **2. 1-2 (not including 2) hours**  **3. 2-3 (not including 3) hours**  **4. 3 hours and above**  **5. Don't know 6. No homework** |
| **C02** | **In the past week, how long in total did you attend cultural remedial classes in English, math, writing, etc.?** | **1. Less than 1 hour**  **2. 1-2 (not including 2) hours**  **3. 2-3 (not including 3) hours**  **4. 3 hours and above**  **5. Don't know 6. No tutorial** |
| **C03** | **At what age did you start attending extracurricular classes?** | **1. Before 3 years of age 2. 3 years of age**  **3. 4 years 4. 5 years**  **5. 6 years old and after**  **6. Never participated (skip to C05)** |
| **C04** | **What type of extracurricular learning classes did you attend before you started elementary school? (Multiple choice)** | **1. Musical instruments (piano, guzheng, etc.)**  **2. cultural classes (English, math, language, etc.)**  **3. physical and aesthetic classes (martial arts, taekwondo, swimming, opera, dance, painting, calligraphy, etc.)**  **4. Chess (Go, Xiangqi, Chess, etc.)**  **5. never attended before elementary school** |
| **C05** | **Do your parents reduce the amount of time you spend exercising so that you have more time to do your homework or attend tuition classes?** | **1. often 2. sometimes 3. no** |
| **C06** | **Do parents limit the amount of time you spend watching TV, playing computers or video games?** | **1. yes, not more than minutes per day**  **2. No** |

**D、reading and writing positions**

|  | **Content of the survey** | **options** |
| --- | --- | --- |
| **D01** | **You read and write with your chest more than a fist away from the edge of the table?** | **1. never 2. occasionally 3 often 4. always** |
| **D02** | **Do you read and write with your eyes more than a foot away from the book (33 centimeters, about 2 small mineral water bottles long)?** | **Do you read and write with your eyes more than a foot away from the book (33 centimeters, about 2 small mineral water bottles long)?** |
| **D03** | **Do you read and write with your fingers about an inch (3.3 centimeters) or so from the tip of the pen?** | 1. never 2. occasionally 3 often 4. always |
| **D04** | **Did your teacher remind you to pay attention to your reading and writing posture?** | 1. never 2. occasionally 3 often 4. always |
| **D05** | **Do your parents remind you of your reading and writing posture?** | 1. never 2. occasionally 3 often 4. always |

**E、Use of electronic screens**

|  | **Content of the survey** | **options** |
| --- | --- | --- |
| **E01** | **On average, how long have you watched TV (including TV games such as X-BOX) per day in the past week?** | **1. I haven't seen it**  **2. less than 1 hour**  **3. 1-2 (not including 2) hours**  **4. 2-3 (not including 3) hours**  **5. 3-4 (not including 4) hours**  **6. 4 hours and above** |
| **E02** | **In the past week, how much time per day do you usually spend on the computer?** | **1. I haven't used it**  **2. less than 1 hour**  **3. 1-2 (not including 2) hours**  **4. 2-3 (not including 3) hours**  **5. 3-4 (not including 4) hours**  **6. 4 hours and above** |
| **E03** | **In the past week, how many hours per day, on average, did you use a mobile electronic device (including cell phones, handheld game consoles, tablets, etc.)?** | **1. I have not used it** |
| **E04** | **In the past week, how much time per day, on average, did you watch TV, use a computer, cell phone, game console, and look at (play with) other electronic screens?** | **2. I have, on average, hours and minutes per day** |

**F、Close eye use (including reading, watching TV, using electronic screens such as computers, cell phones, PSPs, IPads, etc.) habits**

|  | **Content of the survey** | **options** |
| --- | --- | --- |
| **F01** | **Do you read books or electronic screens in direct sunlight?** | 1. never 2. occasionally 3. often 4. always |
| **F02** | **Do you turn off the lights when you look at electronic screens after dark?** | 1. never 2. occasionally 3. often 4. always |
| **F03** | Do you read books or electronic screens lying down or on your back? | 1. never 2. occasionally 3. often 4. always |
| **F04** | Do you read books or electronic screens while walking or riding in a car? | 1. never 2. occasionally 3. often 4. always |
| **F05** | **What kind of light do you use to read and write at home after dark?** | **1. Use both table lamps and roof lights**  **2. Table lamps only**  **3. Roof light only**  **4. Other** |
| **F06** | **Are you using a computer with your eyes more than 66 centimeters (about 3 ordinary mineral water bottles long) away from the computer display?** | **1. never 2. occasionally 3. often 4. always**  **5. never use computer** |
| **F07** | **Are you watching TV/playing TV games with your eyes more than 3 meters away from the TV display?** | **1. never 2. occasionally 3. often 4. always 5. never watch TV** |
| **F08** | **How often do you rest your eyes when using your eyes at close range (looking away, closing your eyes, or being outdoors, etc.)?** | **1. 15 minutes and less**  **2. more than 15 minutes but less than 0.5 hours**  **3. 0.5-1 (not including 1) hour**  **4. 1-2 (excluding 2) hours**  **5. 2-3 (not including 3) hours**  **6. 3 hours and above** |

**G、Outdoor activities and sleep**

|  | **Content of the survey** | **options** |
| --- | --- | --- |
| **G01** | **In the past week, how much time did you spend outdoors during the day each day (cumulative)?** | **1. Less than 1 hour**  **2. 1-2 (not including 2) hours**  **3. 2-3 (not including 3) hours**  **4. 3 hours and above**  **5. Don't know** |
| **G02** | **How many hours of sleep do you get on an average day?** | **Hours Minutes** |
| **G03** | **In the past week, how much time did you spend meditating indoors each day?** | **Hours Minutes** |

**H、Myopia examination and correction**

|  | **Content of the survey** | **options** |
| --- | --- | --- |
| **H01** | **Are your parents nearsighted?** | **1. only the father is myopic**  **2. only the mother is myopic**  **3. both parents are nearsighted**  **4. neither parent is nearsighted** |
| **H02** | **How many vision exams have you had in the past year?** | **1. 0 times 2. 1 time**  **3. 2 times 4. 3 times**  **5. 4 or more times** |
