# Supplementary material for: The incidence of myopia and the factors associated with it among primary and junior high school students in Shihezi, China, a cohort study based on the SHAP model
Source: Research Square preprint supplement (doi:10.21203/rs.3.rs-7522290/v1), 2025-09-17
Supplement: Supplementary file 2 [file f57c5333388f452c3384d742.docx]

Schedule 1. Comparison of Height, Weight, SER and UCVA of OD Between Genders at The Same Grade Level

| Variables | Grade | Boys | Girls | Z | P |
| --- | --- | --- | --- | --- | --- |
| Height, cm | 1 | 125.0 (121.0, 128.5) | 123.0 (119.0, 126.0) | -6.25 | ＜0.001 |
| 2 | 131.0 (127.0, 135.5) | 129.5 (125.0, 134.0) | -6.112 | ＜0.001 |
| 3 | 137.5 (133.0, 142.0) | 135.0 (131.0, 140.0) | -7.18 | ＜0.001 |
| 4 | 141.5 (137.0, 146.0) | 140.5 (136.0, 145.5) | -2.033 | 0.042 |
| 5 | 148.0 (143.5, 153.5) | 149.0 (144.0, 154.0) | -1.473 | 0.141 |
| 6 | 155.5 (150.0, 161.5) | 157.0 (152.0, 161.5) | -1.308 | 0.191 |
| 7 | 162.0 (155.9, 167.5) | 159.0 (155.0, 163.5) | -5.3 | ＜0.001 |
| 8 | 169.5 (164.0, 174.0) | 163.0 (159.0, 167.0) | -13.974 | ＜0.001 |
| 9 | 174.0 (169.5, 178.0) | 135.0 (131.0, 140.0) | -19.769 | ＜0.001 |
| Weight, kg | 1 | 25.9 (23.2, 29.9) | 24.0 (21.3, 28.0) | -6.382 | ＜0.001 |
| 2 | 29.9 (26.0, 36.0) | 27.0 (24.3, 32.9) | -6.646 | ＜0.001 |
| 3 | 34.4 (29.4, 41.7) | 30.7 (27.0, 37.1) | -8.72 | ＜0.001 |
| 4 | 37.1 (31.7, 45.9) | 35.0 (30.1, 41.7) | -4.36 | ＜0.001 |
| 5 | 43.0 (35.9, 52.0) | 41.0 (35.0, 50.9) | -1.881 | 0.06 |
| 6 | 48.7 (41.0, 58.6) | 49.0 (40.9, 57.8) | -0.195 | 0.846 |
| 7 | 53.3 (45.1, 64.1) | 48.9 (43.3, 56.5) | -6.037 | ＜0.001 |
| 8 | 60.4 (52.0, 72.1) | 53.4 (48.0, 61.0) | -9.523 | ＜0.001 |
| 9 | 65.5 (56.5, 77.5) | 55.5 (50.1, 63.8) | -12.517 | ＜0.001 |
| SER, D | 1 | 0.12 (-0.50, 0.50) | 0.13 (-0.37, 0.50) | -0.735 | 0.462 |
| 2 | -0.13 (-0.75, 0.31) | -0.13 (-0.87, 0.25) | -0.156 | 0.876 |
| 3 | -0.38 (-1.25, 0.13) | -0.38 (-1.13, 0.13) | -0.407 | 0.684 |
| 4 | -0.50 (-1.38, 0.13) | -0.63 (-1.63, 0.00) | -3.361 | 0.001 |
| 5 | -0.79 (-2.00, 0.00) | -1.12 (-2.75, -0.13) | -3.872 | ＜0.001 |
| 6 | -1.03 (-2.38, -0.25) | -1.63 (-3.25, -0.41) | -3.646 | ＜0.001 |
| 7 | -1.13 (-2.58, -0.25) | -1.44 (-2.88, -0.51) | -4.127 | ＜0.001 |
| 8 | -1.88 (-3.38, -0.75) | -2.25 (-3.63, -1.01) | -3.758 | ＜0.001 |
| 9 | -2.29 (-4.00, -1.00) | -2.50 (-4.00, -1.25) | -3.32 | 0.001 |
| UCVA of OD | 1 | 5.0 (4.9, 5.0) | 5.0 (4.9, 5.0) | -1.684 | 0.092 |
| 2 | 5.0 (4.9, 5.0) | 5.0 (4.9, 5.0) | -0.662 | 0.508 |
| 3 | 5.0 (4.9, 5.0) | 5.0 (4.9, 5.0) | -0.218 | 0.827 |
| 4 | 5.0 (4.8, 5.0) | 5.0 (4.7, 5.0) | -2.169 | 0.030 |
| 5 | 5.0 (4.8, 5.0) | 4.9 (4.5, 5.0) | -3.04 | 0.002 |
| 6 | 4.9 (4.6, 5.0) | 4.8 (4.4, 5.0) | -3.106 | 0.002 |
| 7 | 4.9 (4.5, 5.0) | 4.8 (4.3, 5.0) | -3.235 | 0.001 |
| 8 | 4.7 (4.4, 5.0) | 4.6 (4.2, 4.9) | -2.689 | 0.007 |
| 9 | 4.6 (4.2, 4.9) | 4.5 (4.2, 4.9) | -1.088 | 0.276 |
